# Supplementary material for: Spatial Distribution of Soil Heavy Metals and Associated Environmental Risks near Major Roads in Southern Tibet, China
Source: MDPI journal article supplement (doi:10.3390/ijerph19148380), 2022-07-08
Supplement: s1 [file s1]

Table S1: Information on the traffic of the major roads in the southern part of the Tibetan Plateau

| Road number | The flow of passenger vehicles | speed(km/h) | The flow of truck | speed(km/h) | The flow of car | speed(km/h) | The flow of motor vehicles | speed(km/h) | Mixed flow | Congestion ratio | Number of trips (pcu·km/d) | Number of dates | Number of hours | Real-time vehicles |
|-------------|--------------------------------|-------------|-------------------|-------------|-----------------|-------------|----------------------------|-------------|------------|------------------|----------------------------|-----------------|-----------------|--------------------|
| G318        | 1523                           | 47.87       | 812               | 41.33       | 2334            | 45.65       | 2485                       | 45.27       | 2485       | 0.35             | 110570                     | 265             | 6312            | 136926             |
| G562        | 890                            | 44.50       | 527               | 41.03       | 1416            | 42.73       | 1619                       | 40.83       | 1619       | 0.39             | 70200                      | 231             | 5502            | 120390             |
| G219        | 755                            | 57.60       | 323               | 49.34       | 1073            | 54.49       | 1139                       | 53.74       | 1139       | 0.26             | 43717                      | 296             | 6941            | 141595             |
| G216        | 339                            | 20.95       | 214               | 15.85       | 553             | 19.50       | 622                        | 18.90       | 622        | 0.27             | 49018                      | 234             | 5597            | 98772              |
